# Supplementary material for: Association of dietary patterns and endoscopic gastric mucosal atrophy in an adult Chinese population
Source: PubMed Central journal article supplement (PMC6851133; doi:10.1038/s41598-019-52951-7), 2019-11-12
Supplement: 41598_2019_52951_MOESM1_ESM.pdf [file 41598_2019_52951_MOESM1_ESM.pdf]

**Title:** Association of dietary patterns and endoscopic gastric mucosal atrophy in an adult Chinese population

**Authors:** Song Lin, PHD<sup>1</sup>, Tao Gao, MD<sup>2</sup>, Chongxiu Sun, MD<sup>1</sup>, Mengru Jia, MD<sup>1</sup>, Chengxia Liu, PHD<sup>2</sup>, Xingbin Ma, PHD<sup>2</sup>, Aiguo Ma, PHD<sup>1,\*</sup>

**Affiliations:** <sup>1</sup>The College of Public Health, Qingdao University, 38 Dengzhou Road, Qingdao, Shandong 266021, China; <sup>2</sup>Digestive endoscopy center, Hospital Affiliated Binzhou Medical University, Binzhou 256603, China.

**\*Correspondence:** Prof. Aiguo Ma, The College of Public Health, Qingdao University, 38 Dengzhou Road, Qingdao, Shandong 266021, China; Email: magfood@qdu.edu.cn; Tel: +86 532 82991518; Fax: +86 532 83812434

**Supplement table 1.** Definition of the food groups used in the dietary pattern analysis.

| Food groups              | Items                                                                                                                    |
|--------------------------|--------------------------------------------------------------------------------------------------------------------------|
| Vegetables               | All kind of green leafy vegetables, tomato, cucumber, pepper, carrot, radish, eggplant, broccoli, cauliflower, and onion |
| Salted vegetables        | Pickled garlic, cucumber, eggplant, radish, and Chinese cabbage                                                          |
| Fruits                   | Apple, orange, pear, and banana                                                                                          |
| Legumes                  | Soybeans, beans, and peanuts                                                                                             |
| Coarse cereals           | Millet, maize, sorghum, and oats                                                                                         |
| Cooked wheaten food      | Wheat                                                                                                                    |
| Cooked rice food         | Rice                                                                                                                     |
| Potatoes                 | Potato and sweet potato                                                                                                  |
| Red meat                 | Pork, beef, and lamb                                                                                                     |
| Processed meat           | Ham, sausage, and bacon                                                                                                  |
| Poultry                  | Chicken, duck, and goose                                                                                                 |
| Dairy and its product    | Milk and yogurt                                                                                                          |
| Beer                     | Bear                                                                                                                     |
| Wine                     | Wine                                                                                                                     |
| Sea fish                 | Sardine, ribbonfish, herring, butterfish, squid, and shrimp                                                              |
| Freshwater fish          | Carp, grass carp, crucian carp, and loach                                                                                |
| Egg                      | Egg                                                                                                                      |
| Corn oil                 | Corn oil                                                                                                                 |
| Peanut oil               | Peanut oil                                                                                                               |
| Soya-bean oil            | Soybean oil                                                                                                              |
| Lard oil                 | Lard oil                                                                                                                 |
| Tea                      | Tea                                                                                                                      |
| Sugar-sweetened beverage | Fruit juice and soft drink                                                                                               |

**Supplement table 2.** Relative validity of food group intakes (g/day) estimated by the FGFQ and 24h dietary recall, and correlations between FGFQ and 24h dietary recall ( $n = 180$ ).

| Food groups           | FGFQ intake |                     | 24h dietary recall |                     | Spearman's $r$ | $p$    |
|-----------------------|-------------|---------------------|--------------------|---------------------|----------------|--------|
|                       | Mean        | Median<br>(P25–P75) | Mean               | Median<br>(P25–P75) |                |        |
| Fresh Vegetables      | 278.9       | 300 (200–350)       | 258.4              | 225 (150–350)       | 0.26           | 0.0005 |
| Salted vegetables     | 16.6        | 2 (0.5–15)          | 9.7                | 0 (0–5)             | 0.46           | <0.001 |
| Fruits                | 100.9       | 100 (13.3–125)      | 52.6               | 0 (0–100)           | 0.30           | 0.0001 |
| Legumes               | 34.3        | 17.9 (6.7–50)       | 32.3               | 0 (0–20)            | 0.13           | 0.0746 |
| Coarse cereals        | 22.2        | 3.3 (0–13.3)        | 20.13              | 0 (0–50)            | 0.73           | <0.001 |
| Cooked wheaten food   | 294.3       | 300 (200–400)       | 295.6              | 300 (200–400)       | 0.40           | <0.001 |
| Cooked rice food      | 70.0        | 35.7 (13.3–100)     | 49.0               | 0 (0–100)           | 0.14           | 0.0584 |
| Potatoes              | 33.7        | 20.0 (6.7–51.8)     | 34.0               | 0                   | 0.19           | 0.0099 |
| Red meat              | 66.7        | 35.7 (14.2–100)     | 53.3               | 0 (0–100)           | 0.34           | <0.001 |
| Poultry               | 16.9        | 6.7 (2.9–16.8)      | 8.3                | 0                   | 0.23           | 0.0017 |
| Dairy and its product | 120.1       | 16.1 (0–178.5)      | 8.67               | 0                   | 0.20           | 0.0063 |
| Alcohol               | 4.07        | 0 (0–2.1)           | 0.58               | 0                   | 0.40           | <0.001 |
| Fish                  | 34.3        | 16.8 (5.0–34.6)     | 21.0               | 0                   | 0.33           | <0.001 |
| Egg                   | 53.1        | 50 (35.7–50)        | 42.8               | 50 (0–50)           | 0.28           | 0.0001 |

Abbreviations: FGFQ, food group frequency questionnaire.

**Supplement Table 3.** Multivariable-adjusted odds ratios for characteristics general across tertiles of dietary patterns' scores.

|                                             | Participants <sup>2</sup> | Crude OR<br>(95%CI) | <i>p</i> for trend | Multi-adjusted ORs <sup>3</sup> | <i>p</i> for trend |
|---------------------------------------------|---------------------------|---------------------|--------------------|---------------------------------|--------------------|
| <b>Age (&lt; 50, ≥ 50 year)<sup>1</sup></b> |                           |                     |                    |                                 |                    |
| <i>Alcohol and fish</i>                     |                           |                     | 0.308              |                                 | 0.768              |
| Tertile 1 (low)                             | 94/97                     | Reference           |                    | Reference                       |                    |
| Tertile 2                                   | 92/98                     | 1.03 (0.69–1.54)    |                    | 1.23 (0.76–1.98)                |                    |
| Tertile 3 (high)                            | 105/88                    | 0.81 (0.54–1.21)    |                    | 1.05 (0.60–1.84)                |                    |
| <i>Traditional</i>                          |                           |                     | <0.001*            |                                 | 0.001*             |
| Tertile 1 (low)                             | 73/117                    | Reference           |                    | Reference                       |                    |
| Tertile 2                                   | 105/87                    | 0.52 (0.34–0.78)    |                    | 0.46 (0.28–0.77)                |                    |
| Tertile 3 (high)                            | 113/79                    | 0.44 (0.29–0.66)    |                    | 0.38 (0.22–0.66)                |                    |
| <i>Coarse cereals</i>                       |                           |                     | 0.011*             |                                 | 0.211              |
| Tertile 1 (low)                             | 86/105                    | Reference           |                    | Reference                       |                    |
| Tertile 2                                   | 93/97                     | 0.85 (0.57–1.28)    |                    | 0.98 (0.61–1.57)                |                    |
| Tertile 3 (high)                            | 112/81                    | 0.59 (0.40–1.62)    |                    | 0.73 (0.44–1.19)                |                    |
| <b>Gender (women, men)</b>                  |                           |                     |                    |                                 |                    |
| <i>Alcohol and fish</i>                     |                           |                     | <0.001*            |                                 | 0.121              |
| Tertile 1 (low)                             | 115/76                    | Reference           |                    | Reference                       |                    |
| Tertile 2                                   | 98/92                     | 1.42 (0.95–2.13)    |                    | 1.24 (0.74–2.06)                |                    |
| Tertile 3 (high)                            | 43/150                    | 5.28 (3.38–9.25)    |                    | 1.51 (0.88–2.95)                |                    |
| <i>Traditional</i>                          |                           |                     | <0.001*            |                                 | <0.001*            |
| Tertile 1 (low)                             | 124/66                    | Reference           |                    | Reference                       |                    |
| Tertile 2                                   | 94/98                     | 1.96 (1.30–2.96)    |                    | 1.92 (1.11–3.31)                |                    |
| Tertile 3 (high)                            | 38/154                    | 7.61 (4.79–12.11)   |                    | 5.69 (3.07–10.56)               |                    |
| <i>Coarse cereals</i>                       |                           |                     | 0.310              |                                 | 0.446              |
| Tertile 1 (low)                             | 82/109                    | Reference           |                    | Reference                       |                    |
| Tertile 2                                   | 101/89                    | 0.66 (0.44–0.99)    |                    | 0.52 (0.30–0.90)                |                    |
| Tertile 3 (high)                            | 73/120                    | 1.24 (0.82–1.86)    |                    | 0.79 (0.45–1.40)                |                    |
| <b>Education (&lt;6, 6–12, &gt;12 year)</b> |                           |                     |                    |                                 |                    |
| <i>Alcohol and fish</i>                     |                           |                     | <0.001*            |                                 | 0.773              |
| Tertile 1 (low)                             | 57/113/21                 | Reference           |                    | Reference                       |                    |
| Tertile 2                                   | 45/116/29                 | 1.38 (0.93–2.04)    |                    | 1.15 (0.71–1.85)                |                    |
| Tertile 3 (high)                            | 32/107/54                 | 2.58 (1.72–3.87)    |                    | 0.89 (0.51–1.55)                |                    |
| <i>Traditional</i>                          |                           |                     | 0.021*             |                                 | 0.084              |
| Tertile 1 (low)                             | 58/98/34                  | Reference           |                    | Reference                       |                    |
| Tertile 2                                   | 44/114/34                 | 1.28 (0.86–1.90)    |                    | 0.87 (0.54–1.42)                |                    |

|                                                                          |           |                  |         |                  |        |
|--------------------------------------------------------------------------|-----------|------------------|---------|------------------|--------|
| Tertile 3 (high)                                                         | 32/124/36 | 1.59 (1.07–2.37) |         | 0.62 (0.36–1.06) |        |
| <i>Coarse cereals</i>                                                    |           |                  | <0.001* |                  | 0.021* |
| Tertile 1 (low)                                                          | 60/108/23 | Reference        |         | Reference        |        |
| Tertile 2                                                                | 41/123/26 | 1.45 (0.98–2.14) |         | 1.35 (0.84–2.16) |        |
| Tertile 3 (high)                                                         | 33/105/55 | 2.66 (1.77–3.99) |         | 1.79 (1.09–2.93) |        |
| <b>Residence (rural, urban)</b>                                          |           |                  |         |                  |        |
| <i>Alcohol and fish</i>                                                  |           |                  | <0.001* |                  | 0.056  |
| Tertile 1 (low)                                                          | 151/40    | Reference        |         | Reference        |        |
| Tertile 2                                                                | 145/45    | 1.17 (0.72–1.90) |         | 0.90 (0.49–1.68) |        |
| Tertile 3 (high)                                                         | 115/78    | 2.56 (1.63–4.02) |         | 1.85 (0.97–3.53) |        |
| <i>Traditional</i>                                                       |           |                  | 0.456   |                  | 0.347  |
| Tertile 1 (low)                                                          | 131/59    | Reference        |         | Reference        |        |
| Tertile 2                                                                | 141/51    | 0.80 (0.52–1.25) |         | 0.86 (0.48–1.53) |        |
| Tertile 3 (high)                                                         | 139/53    | 0.85 (0.54–1.32) |         | 0.74 (0.40–1.38) |        |
| <i>Coarse cereals</i>                                                    |           |                  | 0.016*  |                  | 0.828  |
| Tertile 1 (low)                                                          | 145/46    | Reference        |         | Reference        |        |
| Tertile 2                                                                | 141/49    | 1.10 (0.69–1.74) |         | 0.87 (0.47–1.58) |        |
| Tertile 3 (high)                                                         | 125/68    | 1.71 (1.10–2.67) |         | 0.93 (0.52–1.66) |        |
| <b>Income (&lt; 1000, 1000–3000, &gt; 3000 CNY/month/per-individual)</b> |           |                  |         |                  |        |
| <i>Alcohol and fish</i>                                                  |           |                  | <0.001* |                  | 0.955  |
| Tertile 1 (low)                                                          | 61/69/61  | Reference        |         | Reference        |        |
| Tertile 2                                                                | 41/72/77  | 1.55 (1.07–2.26) |         | 0.79 (0.49–1.28) |        |
| Tertile 3 (high)                                                         | 22/53/118 | 3.49 (2.36–5.16) |         | 1.10 (0.61–1.97) |        |
| <i>Traditional</i>                                                       |           |                  | <0.001* |                  | 0.560  |
| Tertile 1 (low)                                                          | 65/52/73  | Reference        |         | Reference        |        |
| Tertile 2                                                                | 39/75/78  | 1.43 (0.98–2.08) |         | 1.15 (0.71–1.86) |        |
| Tertile 3 (high)                                                         | 20/67/105 | 2.54 (1.73–3.74) |         | 1.17 (0.67–2.04) |        |
| <i>Coarse cereals</i>                                                    |           |                  | <0.001* |                  | 0.273  |
| Tertile 1 (low)                                                          | 50/72/69  | Reference        |         | Reference        |        |
| Tertile 2                                                                | 37/76/77  | 1.28 (0.89–1.85) |         | 1.51 (0.93–2.43) |        |
| Tertile 3 (high)                                                         | 37/46/110 | 2.08 (1.42–3.06) |         | 1.30 (0.78–2.19) |        |
| <b>Body mass index (&lt; 25, ≥ 25 kg/m<sup>2</sup>)</b>                  |           |                  |         |                  |        |
| <i>Alcohol and fish</i>                                                  |           |                  | 0.020*  |                  | 0.811  |
| Tertile 1 (low)                                                          | 138/53    | Reference        |         | Reference        |        |
| Tertile 2                                                                | 132/58    | 1.14 (0.74–1.78) |         | 0.99 (0.61–1.62) |        |
| Tertile 3 (high)                                                         | 118/75    | 1.65 (1.08–2.54) |         | 0.93 (0.54–1.61) |        |
| <i>Traditional</i>                                                       |           |                  | 0.714   |                  | 0.397  |
| Tertile 1 (low)                                                          | 123/67    | Reference        |         | Reference        |        |
| Tertile 2                                                                | 144/48    | 0.61 (0.39–0.95) |         | 0.56 (0.34–0.92) |        |

|                                                          |        |                    |         |                     |         |
|----------------------------------------------------------|--------|--------------------|---------|---------------------|---------|
| Tertile 3 (high)                                         | 121/71 | 1.08 (0.71–1.64)   |         | 0.80 (0.47–1.34)    |         |
| <i>Coarse cereals</i>                                    |        |                    | 0.883   |                     | 0.853   |
| Tertile 1 (low)                                          | 126/65 | Reference          |         | Reference           |         |
| Tertile 2                                                | 136/54 | 0.77 (0.50–1.19)   |         | 0.85 (0.53–1.38)    |         |
| Tertile 3 (high)                                         | 126/67 | 1.03 (0.68–1.57)   |         | 1.05 (0.65–1.69)    |         |
| <b>Smoking (no, yes)</b>                                 |        |                    |         |                     |         |
| <i>Alcohol and fish</i>                                  |        |                    | <0.001* |                     | 0.076   |
| Tertile 1 (low)                                          | 117/74 | Reference          |         | Reference           |         |
| Tertile 2                                                | 120/70 | 0.92 (0.61–1.40)   |         | 0.88 (0.56–1.37)    |         |
| Tertile 3 (high)                                         | 79/114 | 2.28 (1.52–3.43)   |         | 1.63 (0.99–2.69)    |         |
| <i>Traditional</i>                                       |        |                    | <0.001* |                     | 0.076   |
| Tertile 1 (low)                                          | 121/69 | Reference          |         | Reference           |         |
| Tertile 2                                                | 108/84 | 1.36 (0.90–2.06)   |         | 1.25 (0.79–1.96)    |         |
| Tertile 3 (high)                                         | 87/105 | 2.12 (1.40–3.19)   |         | 1.51 (0.93–2.45)    |         |
| <i>Coarse cereals</i>                                    |        |                    | 0.050*  |                     | 0.046*  |
| Tertile 1 (low)                                          | 111/80 | Reference          |         | Reference           |         |
| Tertile 2                                                | 112/78 | 0.97 (0.64–1.45)   |         | 1.04 (0.67–1.62)    |         |
| Tertile 3 (high)                                         | 93/100 | 1.49 (0.98–2.23)   |         | 1.58 (1.01–2.48)    |         |
| <b>Marital status (single/divorced/widowed, married)</b> |        |                    |         |                     |         |
| <i>Alcohol and fish</i>                                  |        |                    | 0.986   |                     | 0.991   |
| Tertile 1 (low)                                          | 6/185  | Reference          |         | Reference           |         |
| Tertile 2                                                | 4/186  | 1.51 (0.42–5.43)   |         | 0.91 (0.072–11.42)  |         |
| Tertile 3 (high)                                         | 6/187  | 1.01 (0.32–3.19)   |         | 0.96 (0.075–12.30)  |         |
| <i>Traditional</i>                                       |        |                    | 0.743   |                     | 0.239   |
| Tertile 1 (low)                                          | 6/184  | Reference          |         | Reference           |         |
| Tertile 2                                                | 5/187  | 1.22 (0.37–4.07)   |         | 10.06 (0.86–118.18) |         |
| Tertile 3 (high)                                         | 5/187  | 1.22 (0.36–4.07)   |         | 4.13 (0.57–36.71)   |         |
| <i>Coarse cereals</i>                                    |        |                    | 0.073   |                     | 0.474   |
| Tertile 1 (low)                                          | 3/188  | Reference          |         | Reference           |         |
| Tertile 2                                                | 4/186  | 0.74 (0.16–3.36)   |         | 16.07 (0.43–595.9)  |         |
| Tertile 3 (high)                                         | 9/184  | 0.33 (0.87–1.22)   |         | 2.89 (0.34–24.55)   |         |
| <b>Drinking (no, yes)</b>                                |        |                    |         |                     |         |
| <i>Alcohol and fish</i>                                  |        |                    | <0.001* |                     | <0.001* |
| Tertile 1 (low)                                          | 178/13 | Reference          |         | Reference           |         |
| Tertile 2                                                | 164/26 | 2.17 (1.09–4.37)   |         | 2.17 (0.97–4.88)    |         |
| Tertile 3 (high)                                         | 83/110 | 18.14 (9.65–34.11) |         | 13.07 (6.18–27.67)  |         |
| <i>Traditional</i>                                       |        |                    | <0.001* |                     | 0.001*  |
| Tertile 1 (low)                                          | 168/22 | Reference          |         | Reference           |         |
| Tertile 2                                                | 150/42 | 2.14 (1.22–3.75)   |         | 1.85 (0.91–3.75)    |         |

|                                             |        |                   |        |                   |        |
|---------------------------------------------|--------|-------------------|--------|-------------------|--------|
| Tertile 3 (high)                            | 107/85 | 6.01 (3.58–10.28) |        | 3.08 (1.56–6.09)  |        |
| <i>Coarse cereals</i>                       |        |                   | 0.524  |                   | 0.311  |
| Tertile 1 (low)                             | 139/52 | Reference         |        | Reference         |        |
| Tertile 2                                   | 151/39 | 0.69 (0.43–1.10)  |        | 0.89 (0.49–1.62)  |        |
| Tertile 3 (high)                            | 135/58 | 1.15 (0.74–1.79)  |        | 0.74 (0.42–1.32)  |        |
| <b><i>H. pylori</i> infection (no, yes)</b> |        |                   |        |                   |        |
| <i>Alcohol and fish</i>                     |        |                   | 0.910  |                   | 0.482  |
| Tertile 1 (low)                             | 132/59 | Reference         |        | Reference         |        |
| Tertile 2                                   | 143/45 | 0.70 (0.45–1.11)  |        | 0.68 (0.42–1.09)  |        |
| Tertile 3 (high)                            | 131/60 | 1.02 (0.66–1.58)  |        | 0.86 (0.51–1.46)  |        |
| <i>Traditional</i>                          |        |                   | 0.137  |                   | 0.241  |
| Tertile 1 (low)                             | 137/51 | Reference         |        | Reference         |        |
| Tertile 2                                   | 143/48 | 0.90 (0.57–1.42)  |        | 0.88 (0.54–1.42)  |        |
| Tertile 3 (high)                            | 126/65 | 1.39 (0.89–2.15)  |        | 1.34 (0.81–2.23)  |        |
| <i>Coarse cereals</i>                       |        |                   | 0.021* |                   | 0.016* |
| Tertile 1 (low)                             | 144/46 | Reference         |        | Reference         |        |
| Tertile 2                                   | 137/51 | 1.17 (0.73–1.85)  |        | 1.18 (0.73–1.90)  |        |
| Tertile 3 (high)                            | 125/67 | 1.68 (1.07–2.62)  |        | 1.78 (1.11–2.86)  |        |
| <b>History of diabetes (no, yes)</b>        |        |                   |        |                   |        |
| <i>Alcohol and fish</i>                     |        |                   | 0.075  |                   | 0.047  |
| Tertile 1 (low)                             | 13/178 | Reference         |        | Reference         |        |
| Tertile 2                                   | 14/176 | 0.92 (0.42–2.01)  |        | 1.07 (0.43–2.67)  |        |
| Tertile 3 (high)                            | 5/188  | 2.75 (0.96–7.86)  |        | 4.52 (1.18–17.33) |        |
| <i>Traditional</i>                          |        |                   | 0.027* |                   | 0.403  |
| Tertile 1 (low)                             | 15/175 | Reference         |        | Reference         |        |
| Tertile 2                                   | 12/180 | 1.29 (0.59–2.82)  |        | 0.88 (0.35–2.18)  |        |
| Tertile 3 (high)                            | 5/187  | 3.21 (1.14–9.01)  |        | 1.88 (0.55–6.38)  |        |
| <i>Coarse cereals</i>                       |        |                   | 0.521  |                   | 0.557  |
| Tertile 1 (low)                             | 10/181 | Reference         |        | Reference         |        |
| Tertile 2                                   | 9/181  | 1.11 (0.44–2.80)  |        | 1.22 (0.44–3.41)  |        |
| Tertile 3 (high)                            | 13/180 | 0.76 (0.33–1.79)  |        | 0.75 (0.28–1.98)  |        |
| <b>History of hypertension (no, yes)</b>    |        |                   |        |                   |        |
| <i>Alcohol and fish</i>                     |        |                   | 0.023* |                   | 0.019* |
| Tertile 1 (low)                             | 15/176 | Reference         |        | Reference         |        |
| Tertile 2                                   | 26/164 | 0.54 (0.28–1.05)  |        | 0.41 (0.19–0.90)  |        |
| Tertile 3 (high)                            | 30/163 | 0.46 (0.24–0.89)  |        | 0.37 (0.15–0.88)  |        |
| <i>Traditional</i>                          |        |                   | 0.058  |                   | 0.122  |
| Tertile 1 (low)                             | 32/158 | Reference         |        | Reference         |        |
| Tertile 2                                   | 19/173 | 1.84 (1.00–3.38)  |        | 1.80 (0.86–3.79)  |        |

|                                                                                                                                                                                                                                                                    |        |                  |         |                  |        |
|--------------------------------------------------------------------------------------------------------------------------------------------------------------------------------------------------------------------------------------------------------------------|--------|------------------|---------|------------------|--------|
| Tertile 3 (high)                                                                                                                                                                                                                                                   | 20/172 | 1.74 (0.96–3.17) |         | 1.81 (0.82–4.01) |        |
| <i>Coarse cereals</i>                                                                                                                                                                                                                                              |        |                  | 0.231   |                  | 0.176  |
| Tertile 1 (low)                                                                                                                                                                                                                                                    | 21/170 | Reference        |         | Reference        |        |
| Tertile 2                                                                                                                                                                                                                                                          | 21/169 | 0.99 (0.52–1.89) |         | 0.76 (0.37–1.57) |        |
| Tertile 3 (high)                                                                                                                                                                                                                                                   | 29/164 | 0.70 (0.38–1.27) |         | 0.61 (0.29–1.25) |        |
| <b>History of taking anticoagulants (no, yes)</b>                                                                                                                                                                                                                  |        |                  |         |                  |        |
| <i>Alcohol and fish</i>                                                                                                                                                                                                                                            |        |                  | 0.048*  |                  | 0.415  |
| Tertile 1 (low)                                                                                                                                                                                                                                                    | 7/184  | Reference        |         | Reference        |        |
| Tertile 2                                                                                                                                                                                                                                                          | 8/182  | 0.87 (0.31–2.43) |         | 0.91 (0.29–2.84) |        |
| Tertile 3 (high)                                                                                                                                                                                                                                                   | 16/177 | 0.42 (0.17–1.05) |         | 0.63 (0.20–1.97) |        |
| <i>Traditional</i>                                                                                                                                                                                                                                                 |        |                  | 0.669   |                  | 0.694  |
| Tertile 1 (low)                                                                                                                                                                                                                                                    | 10/180 | Reference        |         | Reference        |        |
| Tertile 2                                                                                                                                                                                                                                                          | 9/183  | 1.13 (0.45–2.85) |         | 1.26 (0.44–3.55) |        |
| Tertile 3 (high)                                                                                                                                                                                                                                                   | 12/180 | 0.83 (0.35–1.98) |         | 1.25 (0.43–3.61) |        |
| <i>Coarse cereals</i>                                                                                                                                                                                                                                              |        |                  | 0.251   |                  | 0.260  |
| Tertile 1 (low)                                                                                                                                                                                                                                                    | 14/177 | Reference        |         | Reference        |        |
| Tertile 2                                                                                                                                                                                                                                                          | 8/182  | 1.80 (0.74–4.39) |         | 1.57 (0.59–4.20) |        |
| Tertile 3 (high)                                                                                                                                                                                                                                                   | 9/184  | 1.62 (0.68–3.83) |         | 1.71 (0.65–4.53) |        |
| <b>Occupation (not farmer, farmer)</b>                                                                                                                                                                                                                             |        |                  |         |                  |        |
| <i>Alcohol and fish</i>                                                                                                                                                                                                                                            |        |                  | <0.001* |                  | 0.020* |
| Tertile 1 (low)                                                                                                                                                                                                                                                    | 89/102 | Reference        |         | Reference        |        |
| Tertile 2                                                                                                                                                                                                                                                          | 115/75 | 0.57 (0.38–0.85) |         | 0.48 (0.26–0.88) |        |
| Tertile 3 (high)                                                                                                                                                                                                                                                   | 136/57 | 0.37 (0.24–0.56) |         | 0.46 (0.22–0.99) |        |
| <i>Traditional</i>                                                                                                                                                                                                                                                 |        |                  | 0.182   |                  | 0.571  |
| Tertile 1 (low)                                                                                                                                                                                                                                                    | 107/83 | Reference        |         | Reference        |        |
| Tertile 2                                                                                                                                                                                                                                                          | 112/80 | 0.92 (0.61–1.38) |         | 1.02 (0.54–1.92) |        |
| Tertile 3 (high)                                                                                                                                                                                                                                                   | 121/71 | 0.76 (0.50–1.13) |         | 1.25 (0.60–2.63) |        |
| <i>Coarse cereals</i>                                                                                                                                                                                                                                              |        |                  | <0.001* |                  | 0.207  |
| Tertile 1 (low)                                                                                                                                                                                                                                                    | 94/97  | Reference        |         | Reference        |        |
| Tertile 2                                                                                                                                                                                                                                                          | 109/81 | 0.72 (0.48–1.08) |         | 0.86 (0.47–1.57) |        |
| Tertile 3 (high)                                                                                                                                                                                                                                                   | 137/56 | 0.40 (0.26–0.60) |         | 0.65 (0.34–1.26) |        |
| Abbreviations: OR, odd ratio; CNY, Chinese yuan.                                                                                                                                                                                                                   |        |                  |         |                  |        |
| <sup>1</sup> First group is reference (e.g. age < 50 year as reference group).                                                                                                                                                                                     |        |                  |         |                  |        |
| <sup>2</sup> Number of each group's participants in tertiles (starting from the reference group).                                                                                                                                                                  |        |                  |         |                  |        |
| <sup>3</sup> Except for the change of independent variable, models adjusted for as model 3 in Table 4. In addition, the association between adherence to each dietary pattern and education, income was tested by ordered logistic regression in different models. |        |                  |         |                  |        |
| * $p < 0.05$ .                                                                                                                                                                                                                                                     |        |                  |         |                  |        |



**Supplement table 4.** Multivariable-adjusted odds ratios for endoscopic gastric mucosal atrophy across tertiles of dietary patterns' scores, stratified by gender and *H. pylori* infection status.

|                         | Cases/non-cases <sup>1</sup> | Model 1          | <i>p</i> for trend | Model 2          | <i>p</i> for trend | Model 3          | <i>p</i> for trend |
|-------------------------|------------------------------|------------------|--------------------|------------------|--------------------|------------------|--------------------|
| <b>Women</b>            |                              |                  |                    |                  |                    |                  |                    |
| <i>Alcohol and fish</i> |                              |                  | 0.041*             |                  | 0.046*             |                  | 0.104              |
| Tertile 1 (low)         | 51/64                        | Reference        |                    | Reference        |                    | Reference        |                    |
| Tertile 2               | 46/52                        | 1.21 (0.68-2.15) |                    | 1.24 (0.68-2.26) |                    | 1.16 (0.63-2.16) |                    |
| Tertile 3 (high)        | 27/16                        | 2.34 (1.09-5.05) |                    | 2.40 (1.06-5.43) |                    | 2.12 (0.92-4.89) |                    |
| <i>Traditional</i>      |                              |                  | 0.393              |                  | 0.332              |                  | 0.354              |
| Tertile 1 (low)         | 62/62                        | Reference        |                    | Reference        |                    | Reference        |                    |
| Tertile 2               | 41/53                        | 0.94 (0.53-1.70) |                    | 1.01 (0.56-1.85) |                    | 1.16 (0.62-2.17) |                    |
| Tertile 3 (high)        | 21/17                        | 1.58 (0.72-3.45) |                    | 1.69 (0.71-4.02) |                    | 1.52 (0.62-3.74) |                    |
| <i>Coarse cereals</i>   |                              |                  | 0.221              |                  | 0.179              |                  | 0.334              |
| Tertile 1 (low)         | 37/45                        | Reference        |                    | Reference        |                    | Reference        |                    |
| Tertile 2               | 49/52                        | 1.28 (0.69-2.38) |                    | 1.48 (0.76-2.88) |                    | 1.37 (0.69-2.74) |                    |
| Tertile 3 (high)        | 38/35                        | 1.52 (0.77-3.00) |                    | 1.64 (0.79-3.41) |                    | 1.45 (0.68-3.09) |                    |
| <b>Men</b>              |                              |                  |                    |                  |                    |                  |                    |
| <i>Alcohol and fish</i> |                              |                  | 0.166              |                  | 0.350              |                  | 0.132              |
| Tertile 1 (low)         | 40/36                        | Reference        |                    | Reference        |                    | Reference        |                    |
| Tertile 2               | 41/51                        | 0.63 (0.31-1.28) |                    | 0.60 (0.27-1.32) |                    | 0.74 (0.32-1.74) |                    |
| Tertile 3 (high)        | 81/69                        | 1.38 (0.72-2.62) |                    | 1.34 (0.60-3.02) |                    | 1.79 (0.75-4.26) |                    |
| <i>Traditional</i>      |                              |                  | 0.706              |                  | 0.682              |                  | 0.333              |
| Tertile 1 (low)         | 36/30                        | Reference        |                    | Reference        |                    | Reference        |                    |
| Tertile 2               | 52/46                        | 1.24 (0.61-2.59) |                    | 1.23 (0.58-2.64) |                    | 1.15 (0.50-2.62) |                    |
| Tertile 3 (high)        | 74/80                        | 1.18 (0.61-2.30) |                    | 0.92 (0.44-1.93) |                    | 0.74 (0.34-1.65) |                    |

|                                            |       |                      |        |                      |        |                      |        |
|--------------------------------------------|-------|----------------------|--------|----------------------|--------|----------------------|--------|
| <i>Coarse cereals</i>                      |       |                      | 0.004* |                      | 0.001* |                      | 0.003* |
| Tertile 1<br>(low)                         | 50/59 | Reference            |        | Reference            |        | Reference            |        |
| Tertile 2                                  | 47/42 | 1.58 (0.84-<br>3.00) |        | 1.80 (0.91-<br>3.56) |        | 1.85 (0.89-<br>3.82) |        |
| Tertile 3<br>(high)                        | 65/55 | 2.50 (1.34-<br>4.69) |        | 3.03 (1.53-<br>6.03) |        | 3.05 (1.45-<br>6.38) |        |
| <b>Negative <i>H. pylori</i> infection</b> |       |                      |        |                      |        |                      |        |
| <i>Alcohol and fish</i>                    |       |                      | 0.010* |                      | 0.022* |                      | 0.031* |
| Tertile 1<br>(low)                         | 51/81 | Reference            |        | Reference            |        | Reference            |        |
| Tertile 2                                  | 59/84 | 1.29 (0.75-<br>2.20) |        | 1.33 (0.76-<br>2.33) |        | 1.30 (0.74-<br>2.29) |        |
| Tertile 3<br>(high)                        | 65/66 | 2.19 (1.21-<br>3.97) |        | 2.19 (1.13-<br>4.24) |        | 2.12 (1.08-<br>4.15) |        |
| <i>Traditional</i>                         |       |                      | 0.924  |                      | 0.720  |                      | 0.789  |
| Tertile 1<br>(low)                         | 64/73 | Reference            |        | Reference            |        | Reference            |        |
| Tertile 2                                  | 63/80 | 1.24 (0.73-<br>2.11) |        | 1.25 (0.72-<br>2.18) |        | 1.31 (0.75-<br>2.30) |        |
| Tertile 3<br>(high)                        | 48/78 | 1.10 (0.56-<br>1.83) |        | 0.86 (0.45-<br>1.63) |        | 0.88 (0.46-<br>1.69) |        |
| <i>Coarse cereals</i>                      |       |                      | 0.016* |                      | 0.005* |                      | 0.005* |
| Tertile 1<br>(low)                         | 56/88 | Reference            |        | Reference            |        | Reference            |        |
| Tertile 2                                  | 62/75 | 1.59 (0.94-<br>2.68) |        | 1.72 (1.00-<br>2.98) |        | 1.74 (1.00-<br>3.02) |        |
| Tertile 3<br>(high)                        | 57/68 | 1.95 (1.12-<br>3.39) |        | 2.34 (1.28-<br>4.26) |        | 2.35 (1.28-<br>4.32) |        |
| <b>Positive <i>H. pylori</i> infection</b> |       |                      |        |                      |        |                      |        |
| <i>Alcohol and fish</i>                    |       |                      | 0.520  |                      | 0.293  |                      | 0.285  |
| Tertile 1<br>(low)                         | 40/19 | Reference            |        | Reference            |        | Reference            |        |
| Tertile 2                                  | 27/18 | 0.58 (0.23-<br>1.47) |        | 0.56 (0.19-<br>1.66) |        | 0.51 (0.16-<br>1.62) |        |
| Tertile 3<br>(high)                        | 42/18 | 1.38 (0.55-<br>3.43) |        | 2.11 (0.61-<br>7.29) |        | 2.19 (0.61-<br>7.86) |        |
| <i>Traditional</i>                         |       |                      | 0.830  |                      | 0.497  |                      | 0.607  |
| Tertile 1<br>(low)                         | 34/17 | Reference            |        | Reference            |        | Reference            |        |
| Tertile 2                                  | 29/19 | 0.65 (0.25-<br>1.83) |        | 0.57 (0.19-<br>1.66) |        | 0.46 (0.14-<br>1.47) |        |

|                                                                                                                                                                                          |       |                      |       |                      |       |                      |       |
|------------------------------------------------------------------------------------------------------------------------------------------------------------------------------------------|-------|----------------------|-------|----------------------|-------|----------------------|-------|
|                                                                                                                                                                                          |       | 1.70)                |       | 1.75)                |       | 1.50)                |       |
| Tertile 3<br>(high)                                                                                                                                                                      | 46/19 | 1.08 (0.41-<br>2.86) |       | 1.41 (0.46-<br>4.38) |       | 1.26 (0.39-<br>4.06) |       |
| <i>Coarse cereals</i>                                                                                                                                                                    |       |                      | 0.501 |                      | 0.174 |                      | 0.119 |
| Tertile 1<br>(low)                                                                                                                                                                       | 31/15 | Reference            |       | Reference            |       | Reference            |       |
| Tertile 2                                                                                                                                                                                | 33/18 | 0.96 (0.37-<br>2.48) |       | 1.28 (0.42-<br>3.91) |       | 1.40 (0.43-<br>4.49) |       |
| Tertile 3<br>(high)                                                                                                                                                                      | 45/22 | 1.35 (0.54-<br>3.37) |       | 2.10 (0.69-<br>6.35) |       | 2.48 (0.76-<br>8.05) |       |
| <sup>1</sup> Cases with gastric mucosal atrophy/non-cases in tertiles.<br>In gender subgroups, model 1 only adjusted for age. Other models adjusted for as in Table 4.<br>* $p < 0.05$ . |       |                      |       |                      |       |                      |       |
